# Supplementary material for: Intercepting IRE1 kinase‐FMRP signaling prevents atherosclerosis progression
Source: PubMed Central journal article supplement (PMC8988208; doi:10.15252/emmm.202115344), 2022-02-22

Fig.1B

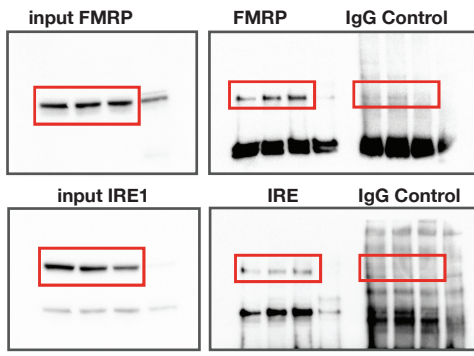

Fig.1C

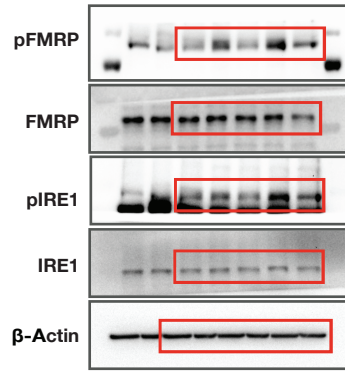

Fig.1D

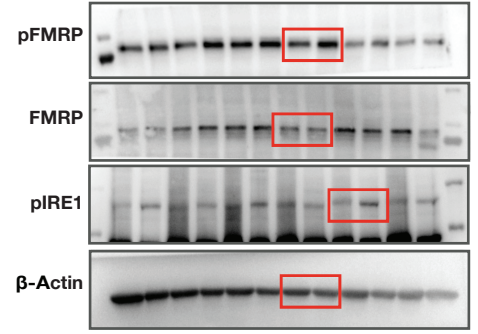

Fig.1E

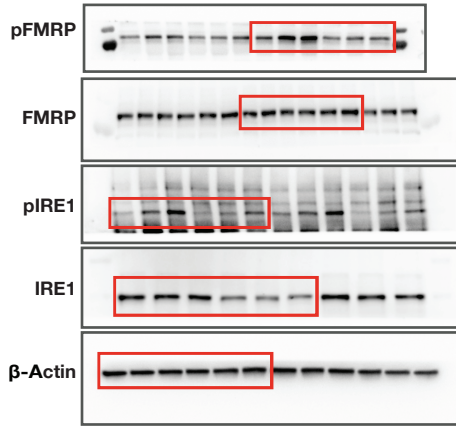

Fig.1F

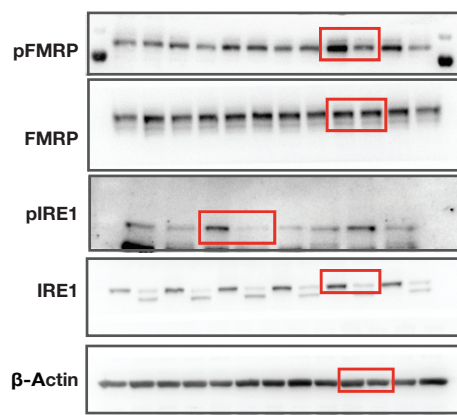

Fig.1G

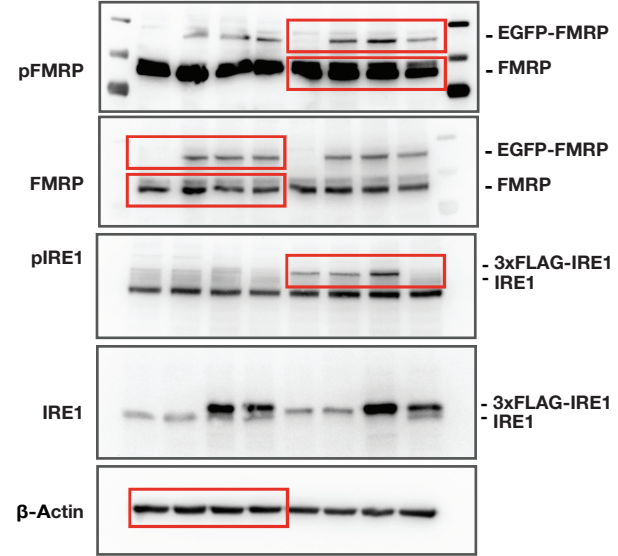

Fig.1H

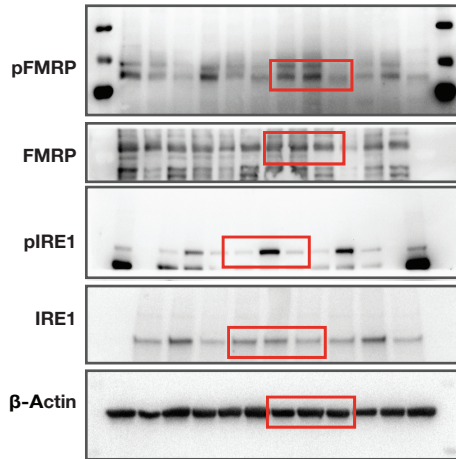

Fig.1I

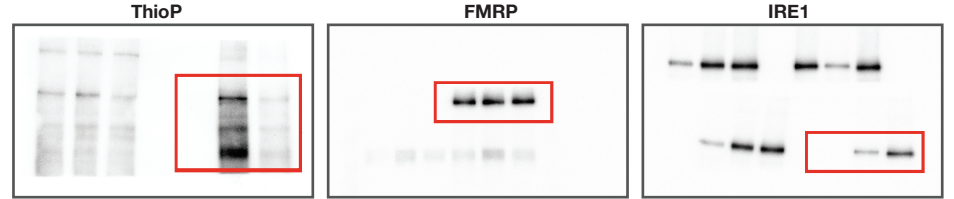

Fig.1J

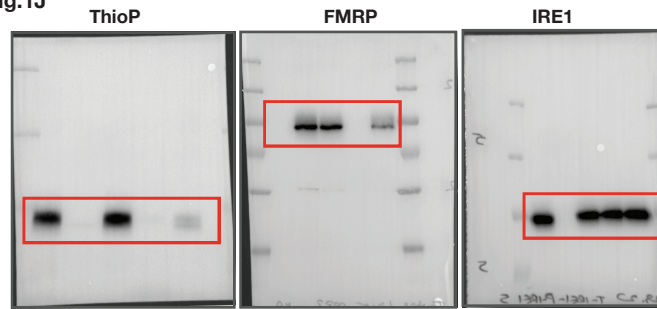

Fig.1K

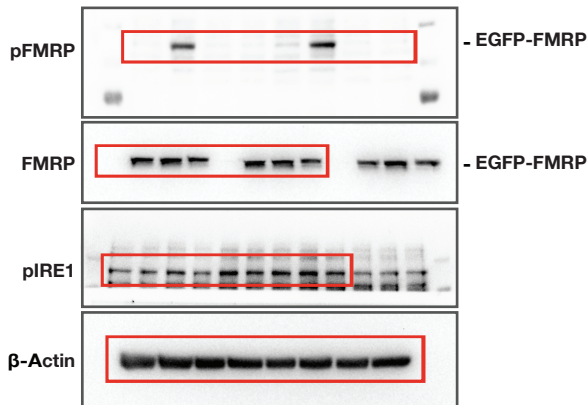

Supplement: EMMM-14-e15344-s005.pdf [file EMMM-14-e15344-s005.pdf]
