# Supplementary material for: Intercepting IRE1 kinase‐FMRP signaling prevents atherosclerosis progression
Source: PubMed Central journal article supplement (PMC8988208; doi:10.15252/emmm.202115344), 2022-02-22
Supplement: EMMM-14-e15344-s007.pdf [file EMMM-14-e15344-s007.pdf]

Supplementary Materials for

**Title: Intercepting IRE1 Kinase-FMRP Signaling Prevents  
Atherosclerosis Progression**

**Authors:** Zehra Yildirim<sup>1,2</sup>, Sabyasachi Baboo<sup>3</sup>, Syed M. Hamid<sup>1</sup>, Asli E. Dogan<sup>1,2</sup>, Ozlem Tufanli<sup>4</sup>, Sabrina Robichaud<sup>5</sup>, Christina Emerton<sup>5</sup>, Jolene K. Diedrich<sup>3</sup>, Hasan Vatandaslar<sup>6</sup>, Fotis Nikolos<sup>7</sup>, Yanghong Gu<sup>8</sup>, Takao Iwawaki<sup>9</sup>, Elizabeth Tarling<sup>10</sup>, Mireille Ouimet<sup>5</sup>, David L. Nelson<sup>8</sup>, John R. Yates III<sup>3</sup>, Peter Walter<sup>10</sup>, Ebru Erbay<sup>1,11\*</sup>

This PDF file includes:

Figures and Figure Legends for Appendix Fig.S1-S6

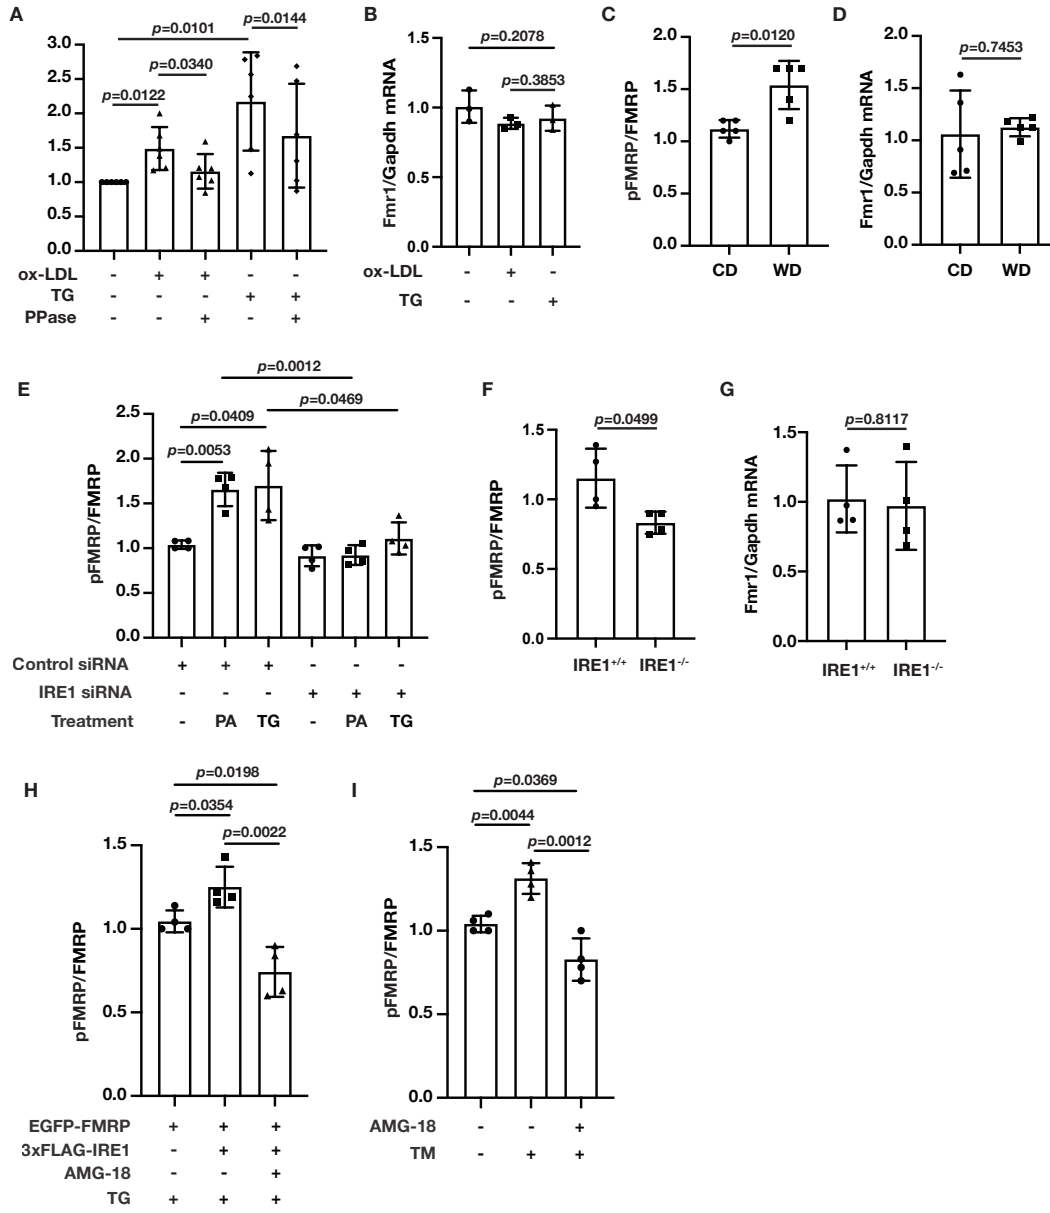

J

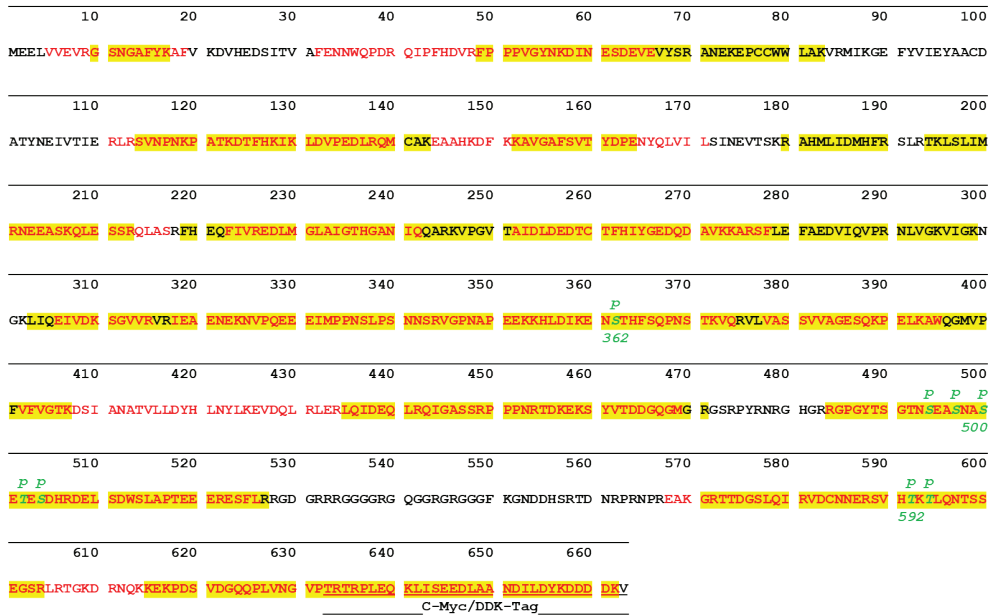

K

| AA    | Sequence                                   | z | XCorr         | DeltaCN       | [M+H] <sup>+</sup> | A-Score      |
|-------|--------------------------------------------|---|---------------|---------------|--------------------|--------------|
| pS362 | HLDIKENpSTHFSQPNSTK                        | 3 | 2.8194        | 0.3306        | 2162.9890          | 14.23        |
|       | KHLDIKENpSTHFSQPNSTK                       | 3 | 3.2526        | 0.3569        | 2291.0808          | 33.7         |
|       | KHLDIKENpSTHFSQPNSTK                       | 4 | 3.4197        | 0.2304        | 2291.0813          | 34.46        |
| pS494 | RGPGYSGTNpSEASNA                           | 2 | 3.0995        | 0.4448        | 1648.6614          | 13.27        |
| pS497 | RGPGYSGTNSEApSNASETSDHRELDSDWVSLAPTEEERE   | 4 | 3.457         | 0.3924        | 4476.8633          | 7.81         |
| pS500 | pSETSDHRELDSDW                             | 2 | 3.1722        | 0.3710        | 1785.6604          | 22.85        |
|       | NApSETSDHRELDSDW                           | 2 | 3.1225        | 0.3763        | 1970.7406          | 30.93        |
| >     | NApSETSDHRELDSDW                           | 2 | <b>4.0257</b> | <b>0.4280</b> | <b>1970.7393</b>   | <b>39.56</b> |
|       | NApSETSDHRELDSDW                           | 2 | 3.3907        | 0.3348        | 1970.7386          | 33.68        |
| pT502 | RGPGYSGTNSEASNASePTESDHRDELDSDWVSLAPTEEERE | 4 | 6.2067        | 0.5107        | 4476.8564          | 4.6          |
| pS504 | SETEpSDHRELDSDW                            | 2 | 3.431         | 0.3944        | 1785.6588          | 15.5         |
| pT592 | SVHpTKTLQNTSSEGSR                          | 3 | 3.996         | 0.2936        | 1811.8281          | 6.17         |
|       | SVHpTKTLQNTSSEGSR                          | 3 | 4.4606        | 0.3795        | 1811.8282          | 7.53         |
|       | SVHpTKTLQNTSSEGSR                          | 3 | 3.5417        | 0.3859        | 1811.8276          | 11.79        |
| pT594 | SVHTKpTLQNTSSEGSR                          | 3 | 3.1378        | 0.3386        | 1811.8282          | 10.36        |

**Appendix Figure S1. Supplemental figure related to Figure 1.**

- A** Western blot quantifications for pFMRP/FMRP ratio in Fig 1C.
- B** qRT-PCR analysis of Fmr1 mRNA from the samples in Fig 1C (n=4 biological replicates).
- C** Western blot quantifications for pFMRP/FMRP ratio in Fig 1D.
- D** qRT-PCR analysis for Fmr1 mRNA from the samples in Fig 1D (n=3 biological replicates).
- E** Western blot quantifications for pFMRP/FMRP ratio in Fig 1E.
- F** Western blot quantifications for pFMRP/FMRP ratio in Fig 1F.
- G** qRT-PCR analysis for Fmr1 mRNA from the samples in Fig 1F (n=6 biological replicates).
- H** Western blot quantifications for pFMRP/FMRP ratio in Fig 1G.
- I** Western blot quantifications for pFMRP/FMRP ratio in Fig 1H.
- J** pFMRP sequence covered (83%) with two different digestion strategies – Proteinase K (red text) and Trypsin-GluC (highlighted yellow) using LC-MS/MS in samples from Fig 1H.
- K** LC-MS/MS identified phosphorylated peptides from the samples in Fig 1H; with sites of phosphorylation (AA), charge state (z), identification parameters (XCorr and DeltaCN – greater values indicate higher confidence by peptide-spectrum match/PSM), measured precursor mass ([M+H]<sup>+</sup>), and a confidence score for localization of phosphorylation on an amino acid (A-Score, value > 19 and > 13, represent > 99% and > 95% confidence, respectively); the peptide marked with (>) was evaluated further.

**Data information:** Data are mean ± SEM. Unpaired *t*-test with Welch's correction.



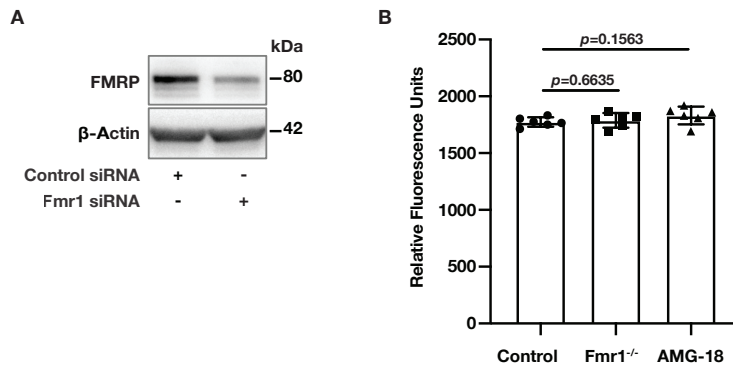

**Appendix Figure S2. Supplemental figure related to Figure 2.**

- A** Protein lysates from macrophages used in Fig 2C were analyzed by western blotting using specific antibodies for FMRP and  $\beta$ -Actin.
- B** Fmr1<sup>-/-</sup> or AMG-18 pre-treated cells (10  $\mu$ M, 1 hour) were treated with fluorescently labeled cholesterol for 4 hours (n=6 biological replicates).

**Data information:** Data are mean  $\pm$  SEM. Unpaired *t*-test with Welch's correction.

A

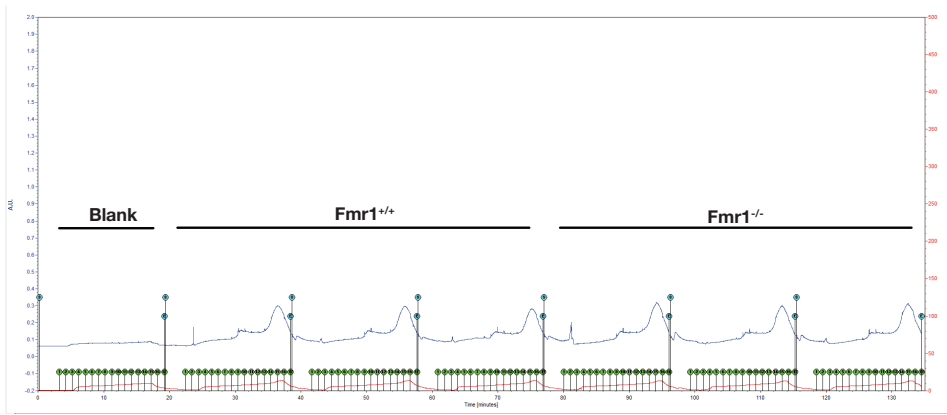

B

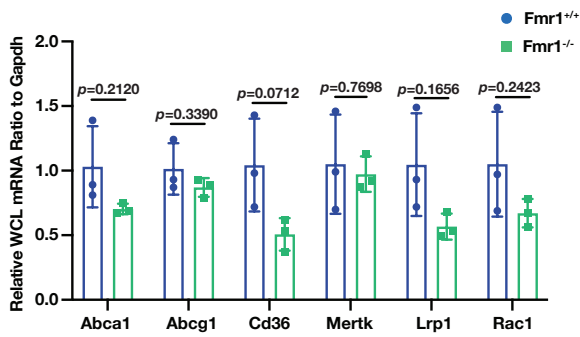

C

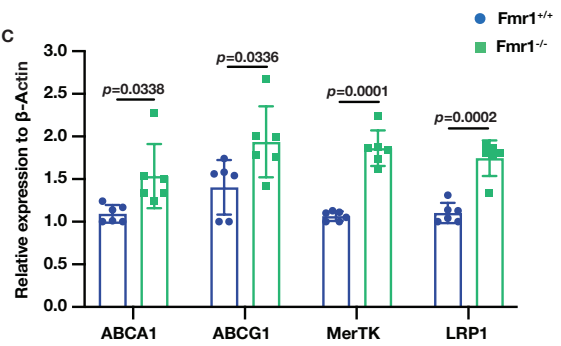

D

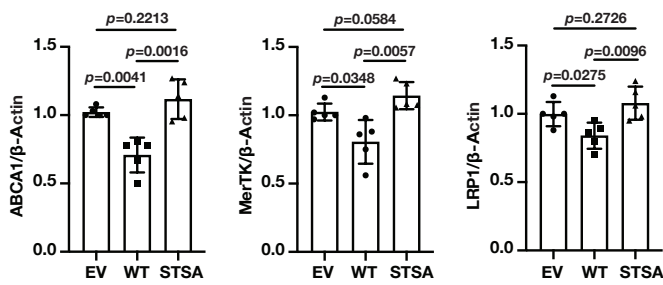

**Appendix Figure S3. Supplemental figure related to Figure 4.**

- A** mRNA distribution of fractions from Fmr1<sup>+/+</sup> and Fmr1<sup>-/-</sup> RNA samples after sucrose gradient.
- B** qRT-PCR analysis of Abca1, Abcg1, Mertk, Lrp1, Cd36 and Rac1 in total mRNA levels from same samples used in polysome fractions (n=3 biological replicates).
- C** Western blot quantifications for ABCA1, ABCG1, MerTK and LRP1 in Fig 4C. The fold change of protein expression level was calculated relative to  $\beta$ -Actin.
- D** Western blot quantifications for ABCA1, MerTK and LRP1 in Fig 4D. The fold change of protein expression level was calculated relative to  $\beta$ -Actin.

**Data information:** Data are mean  $\pm$  SEM. Unpaired t-test with Welch's correction.

Appendix Figure S4

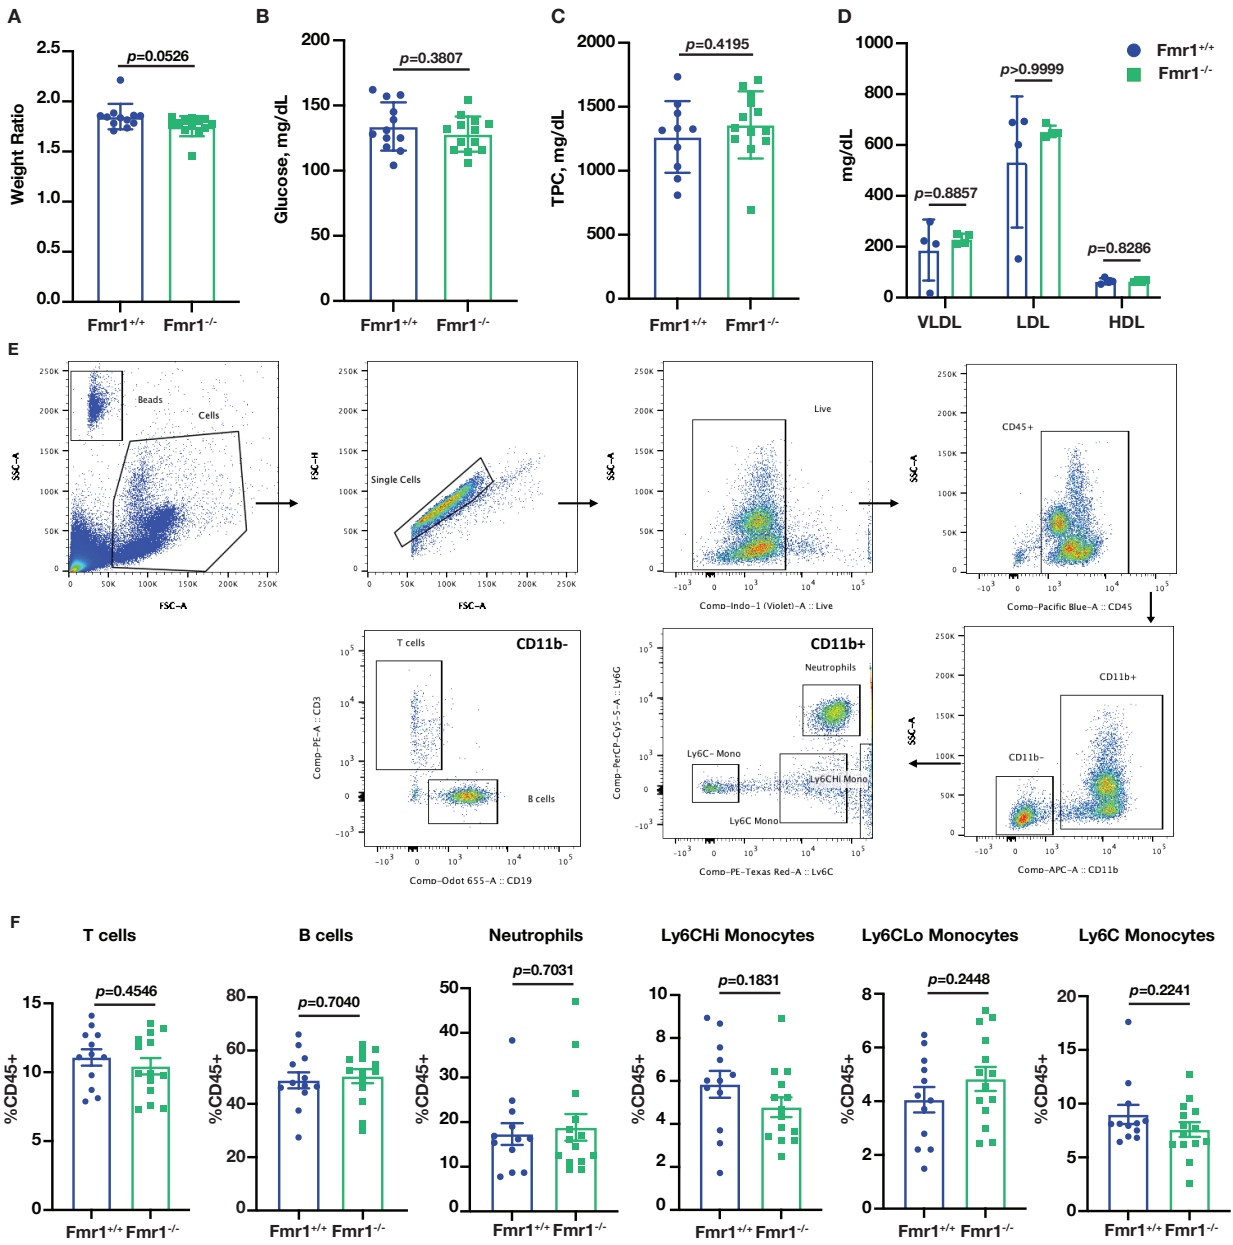

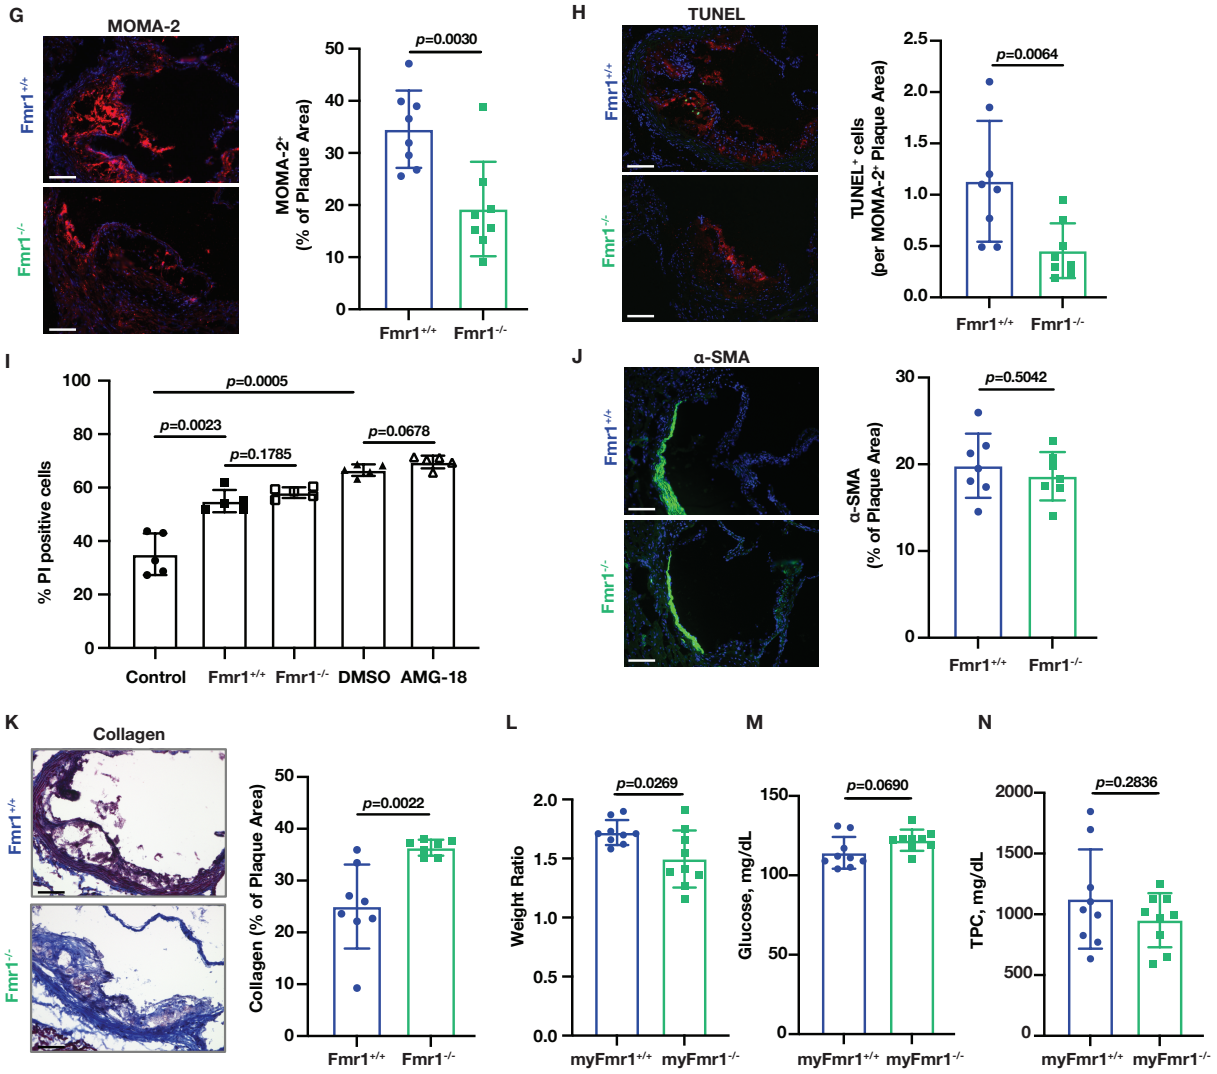

**Appendix Figure S4. Supplemental figure related to Fig 5.**

- A** The ratio of mouse weight at the beginning of the experiment over the weight at the end of the experiment in Fig 5A (n=12-13 mice per group).
- B-D** Plasma measurements for (B) glucose (n=12-13 mice per group), (C) cholesterol (n=12-13 mice per group) and (D) lipoproteins (n=4 mice per group) from mice in Fig 5A.
- E** Gating strategy for the flow cytometry analysis of mouse peripheral blood.
- F** Abundance of B cells, T cells and monocytes in the peripheral blood as % of total CD45<sup>+</sup> cells from the Fmr1<sup>+/+</sup> and Fmr1<sup>-/-</sup> mice in Fig.5A (n=12-13 mice per group).
- G** Macrophage area was calculated from MOMA-2 (red)-stained aortic root sections as % of MOMA2<sup>+</sup> stained area to total plaque area (n=8 mice per group; Scale bar = 100  $\mu$ m).
- H** Apoptosis was calculated from the number of TUNEL<sup>+</sup> cells (green) in the MOMA-2-stained (red) plaque area (n=8 mice per group; Scale bar = 100  $\mu$ m).
- I** Fmr1<sup>+/+</sup> and Fmr1<sup>-/-</sup> BMDMs or AMG-18 pre-treated cells (10  $\mu$ M, 1 hour) were treated with PA (500  $\mu$ M) treatment for 12 hours and then stained with Propidium iodide (PI) (n=5 biological replicates).
- J** % Smooth muscle actin ( $\alpha$ -SMA) was calculated from aortic root sections stained with  $\alpha$ -SMA (green) as %  $\alpha$ -SMA<sup>+</sup> area to the total plaque area (n=8 mice per group, Scale bar 100  $\mu$ m).
- K** % collagen area was calculated from Masson's Trichrome staining as the percentage of collagen (blue) area in total plaque area (n=8 mice per group; Scale bar = 100  $\mu$ m).
- L** The ratio of mouse weight at the beginning of the experiment over the weight at the end of the experiment in Fig. 5F (n=9 mice per group).
- M-N** Plasma measurements for (M) glucose (n=9 mice per group) and (N) cholesterol (n=9 mice per group) from mice in Fig 5F.

**Data information:** Data are mean  $\pm$  SEM; Mann Whitney U test.

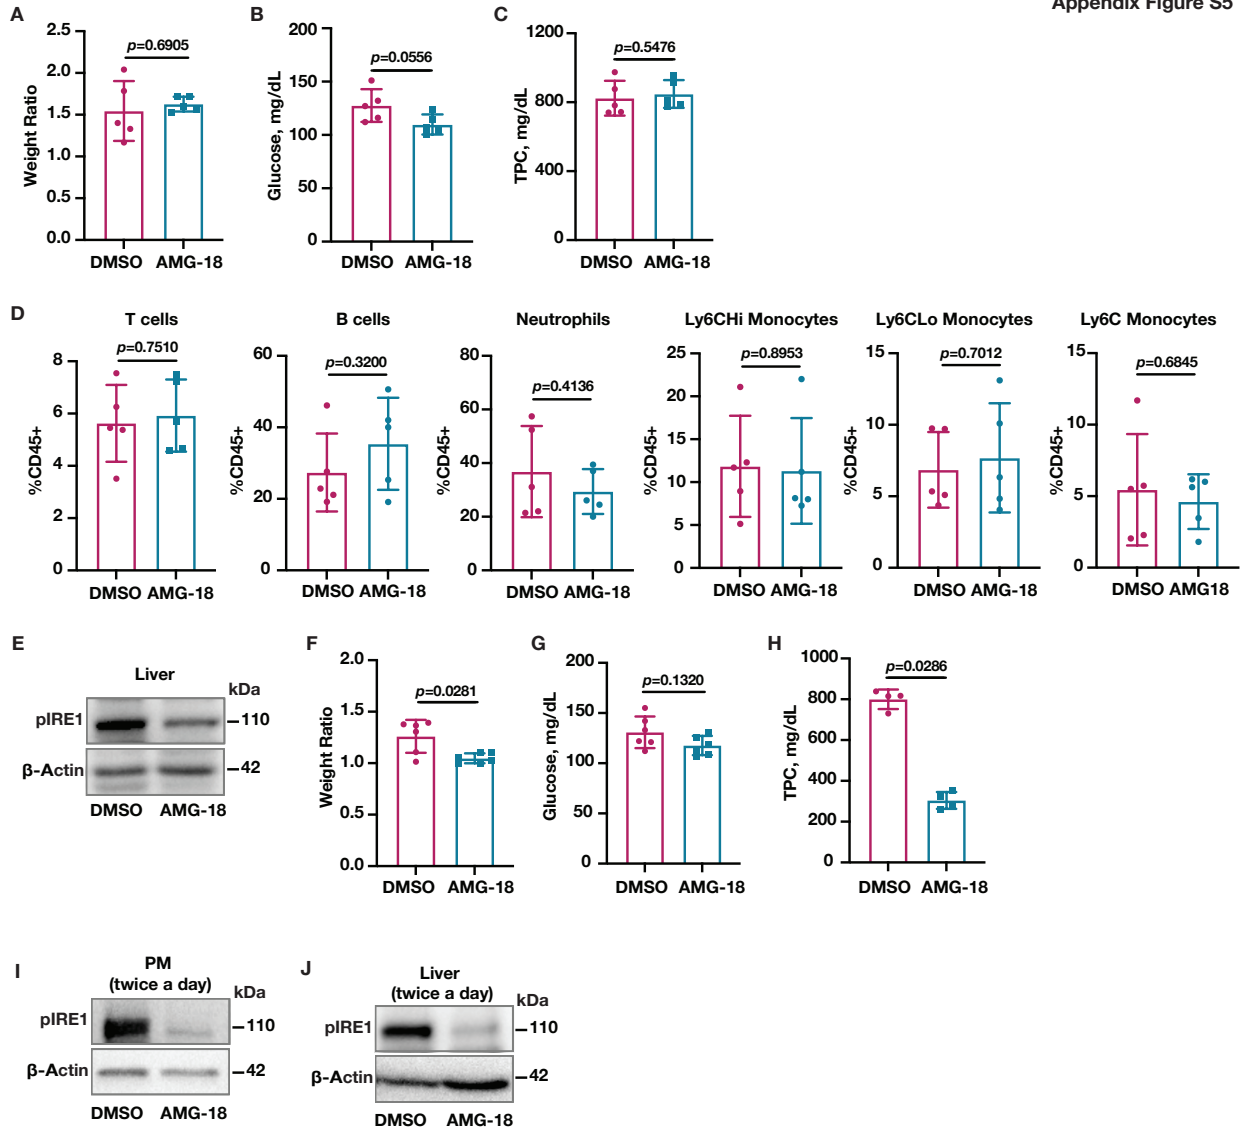

**Appendix Figure S5. Supplemental figure related to Fig 6.**

- A** The ratio of mouse weight at the beginning of the experiment over the weight at the end of the experiment in Fig. 6A (n=5 mice per group).
- B-D** Plasma measurements for (B) glucose (n=5 mice per group) and (C) cholesterol (n=5 mice per group) from mice in Fig. 6A. (D) Abundance of B cells, T cells and monocytes in the peripheral blood as % of total CD45<sup>+</sup> cells from the vehicle (DMSO) or AMG-18 (30 mg/kg) once a day injected mice in Fig. 6A (n=5 mice per group).
- C** Protein lysates of liver from mice in Fig. 6A. Proteins were analyzed by western blotting using specific antibodies for pIRE1 and  $\beta$ -Actin (n=5 mice per group).
- F** The ratio of mouse weight at the beginning of the experiment over the weight at the end of the experiment in Fig. 6F (n=6 mice per group).
- G-H** Plasma measurements for (G) glucose (n=6 mice per group) and (H) cholesterol (n=6 mice per group) from Fig 6F.
- I-J** Protein lysates of (I) thioglycolate-elicited PM and (J) liver from mice in Fig 6F. Proteins were analyzed by western blotting using specific antibodies for pIRE1 and  $\beta$ -Actin (n=6 mice per group).

**Data information:** Data are mean  $\pm$  SEM; Mann Whitney U test.



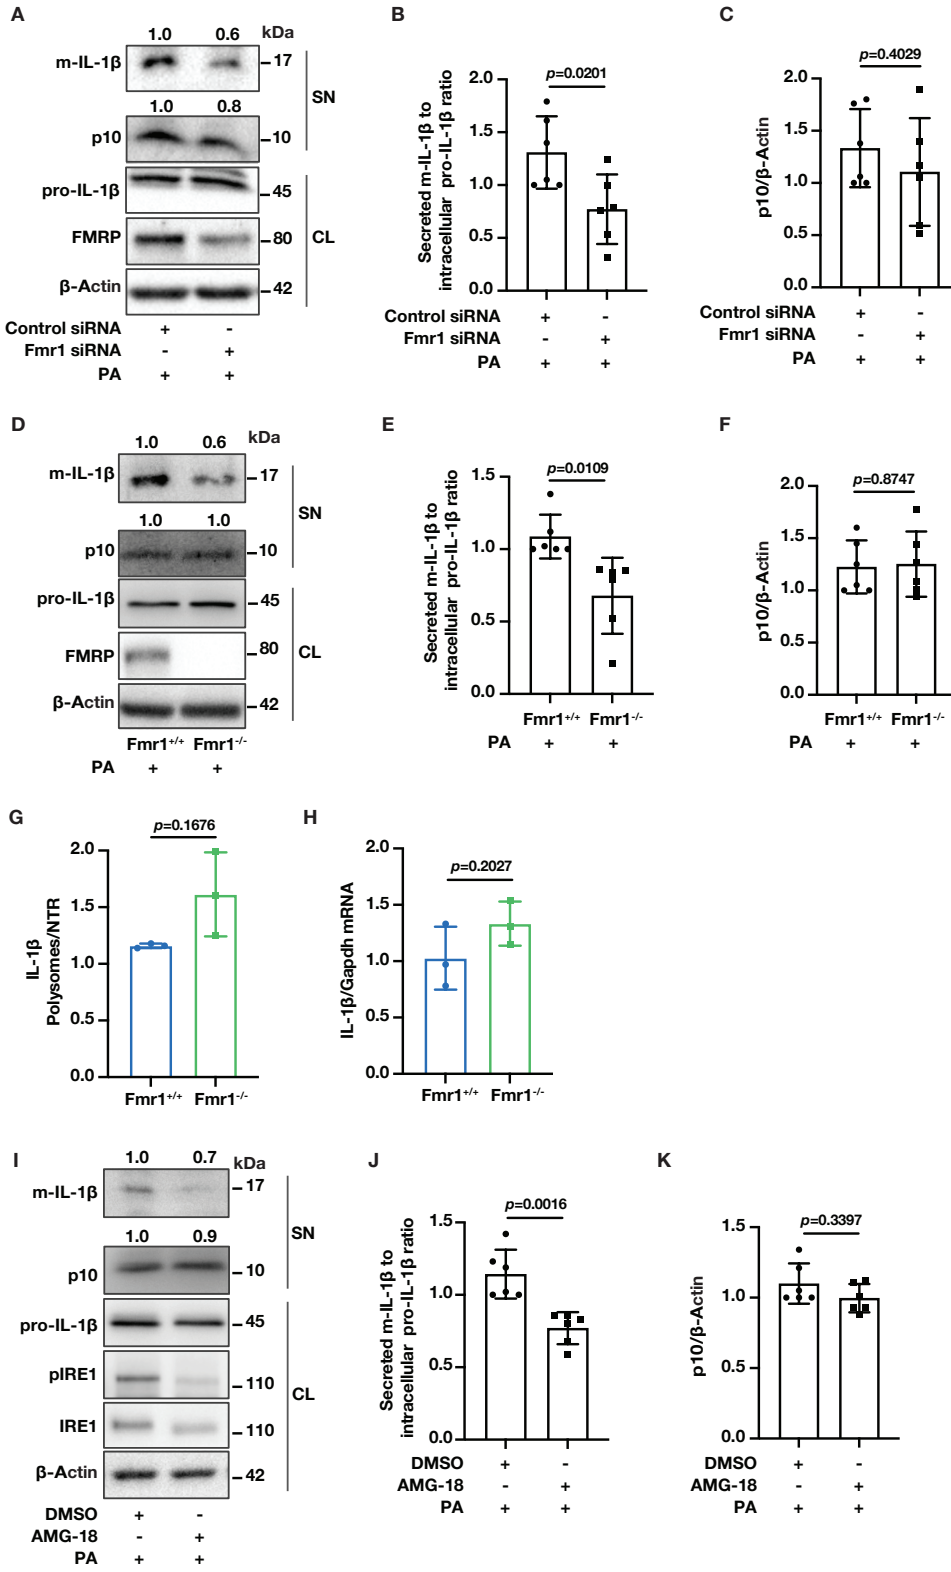

**Appendix Figure S6. IRE1 Kinase domain and FMRP regulates IL-1 $\beta$  secretion in macrophages.**

- A** BMDMs were transfected with Fmr1- or control-siRNA and 24 hours after transfection cells were primed with LPS (200  $\mu$ M) for 3 hours followed by PA (500  $\mu$ M) treatment for 16 hours (n=6 biological replicates).
- B** Quantification of secreted m-IL-1 $\beta$  to intracellular pro-IL-1 $\beta$  ratio normalized to  $\beta$ -Actin in Appendix Figure S6A.
- C** Quantification of secreted p10 (caspase 1) to  $\beta$ -Actin in Appendix Figure S6A.
- D** Fmr1<sup>+/+</sup> and Fmr1<sup>-/-</sup> BMDMs were primed with LPS (200  $\mu$ M) for 3 hours followed by PA (500  $\mu$ M) treatment for 16 hours (n=6 biological replicates).
- E** Quantification of secreted m-IL-1 $\beta$  to intracellular pro-IL-1 $\beta$  ratio normalized to  $\beta$ -Actin in Appendix Figure S6D.
- F** Quantification of secreted p10 (caspase 1) to  $\beta$ -Actin in Appendix Figure S6D.
- G** The ratio of the pro-IL-1 $\beta$  mRNA in polysome to NTR fraction (n=3 biological replicates).
- H** qRT-PCR analysis of pro-IL-1 $\beta$  in total mRNA levels from same samples used in polysome fractions (n=3 biological replicates).
- I** BMDM cells were pre-treated with AMG-18 (10  $\mu$ M) for 1 hour and the primed with LPS (200  $\mu$ M) for 3 hours followed by PA (500  $\mu$ M) treatment for 16 hours (n=6 biological replicates).
- J** Quantification of secreted m-IL-1 $\beta$  to intracellular pro-IL-1 $\beta$  ratio normalized to  $\beta$ -Actin in Appendix Figure S6I.
- K** Quantification of secreted p10 (caspase 1) to  $\beta$ -Actin in Appendix Figure S6I.

**Data information:** A representative blot is shown. In A and I data are cumulative results of 2 independent experiments. In D data are cumulative results of 3 independent experiments. Supernatants were analyzed by western blotting using specific antibody for IL-1 $\beta$  and caspase-1 and protein lysates were analyzed by western blotting using specific antibodies for FMRP, pIRE1, IRE1 and  $\beta$ -Actin and fold inductions are depicted above the blots. Data are mean  $\pm$  SEM. Unpaired *t*-test with Welch's correction.
